# Supplementary material for: A rapid and efficient screening system for neutralizing antibodies and its application for SARS-CoV-2
Source: Research Square preprint supplement (doi:10.21203/rs.3.rs-87599/v1), 2020-10-28
Supplement: Supplementary file 1 [file 28d11788cbc49af156a4f43d.xlsx]

## Sheet: Fig. 4
Fig.4 Identification of RBD neutralizing monoclonal antibodies from convalescent COVID-19 patients
Name	The OD 405 nm values by ELISA ( against S1)	The OD 405 nm values by ELISA (against RBD)	Neutralizationg (%)
81F2	0.88	2.06	54.88
82C12	0.96	1.84	15.93
81A2	0.99	1.46	15.24
81B2	1.1	1.4	98.24
81D2	0.93	1.36	90.68
81A6	0.87	1.12	88.97
81B7	1.07	0.96	18.81
81D7	0.3565	0.7115	37.11
81C8	0.44	0.71	89.91
81E8	0.248	0.708	19.84
82G1	0.235	0.568	86.61
82C4	0.58	0.56	0
82A5	0.3325	0.55	90.87
82A6	0.72	0.47	99.22
82B6	0.19	0.47	70.59
82C6	0.296	0.45	51.22
82F6	0.2845	0.3635	75
82B7	0.36	0.34	99.69
82G8	0.2505	0.308	0
81A1	0.38	0.3	48.2
81C4	0.2445	0.2745	0
81G8	0.15	0.25	48.2
81B12	0.184	0.229	37.65
81E1	0.1335	0.175	0
81D5	0.37	0.16	0
81E10	0.12	0.12	96.97
81A11	0.13	0.12	91.87
81C3	0.162	0.109	97.58
81C7	0.423	0.098	48.18
51D4	2.4985	2.5505	99.75
51D3	2.1035	2.33	99.7
51A3	0.76	2.27	86.5
51D2	0.98	2.23	99.69
51A1	0.8	2.2	100
51E12	2.264	2.15	87.71
51D12	1.889	2.1195	70.98
51F11	1.81	2.07	92.9
51E10	1.0005	2.057	99.75
51E7	0.69	2.03	45.16
51D7	0.64	2	84.61
51F5	1.96	2	0
51E3	0.66	2	31.83
51B1	1.614	1.9895	8.6
52A1	0.8135	1.9085	87.73
52C1	2.098	1.9045	81.75
52G1	1.6905	1.9035	89.11
52C6	2.01	1.9	96.46
52E7	1.948	1.875	94.6
52B6	1.8875	1.8725	99.67
52F7	2.135	1.84	99.73
52B8	2.24	1.84	76.21
52E9	2.0935	1.8235	47.3
52G9	0.729	1.816	99.77
53H6	1.65	1.81	99.71
53C5	0.58	1.8	67.71
53F9	1.86	1.79	0
53H3	1.78	1.7835	99.74
53G1	0.2	1.78	85.11
53H5	2.1005	1.7665	58.8
53B2	0.48	1.76	71.26
53C10	2.0555	1.7215	58.5
53E11	1.78	1.72	30.27
53E12	1.948	1.7095	58.02
53G6	1.73	1.69	99.7
53F12	2.1155	1.6695	99.77
54H2	0.6905	1.668	19.05
54F10	0.665	1.641	23.71
54H5	0.5565	1.6335	87.79
54F2	1.4515	1.6305	0
54G7	1.842	1.5915	95.71
54D11	1.869	1.5505	0
54D12	0.56	1.55	0
55D12	1.6285	1.521	6.55
55G3	1.82	1.51	8.77
55G9	1.7775	1.508	13.33
55C9	0.41	1.5	99.74
55A8	0.61	1.5	99.58
55G11	1.62	1.49	26.33
55B3	1.8865	1.4765	0
55B5	1.848	1.454	0
56C3	1.73	1.44	64.48
56H3	1.426	1.429	90.88
56B4	1.6455	1.429	39.55
56D7	1.7225	1.4255	99.76
56H7	1.1945	1.423	97.02
56A8	0.3745	1.4205	1.07
56E8	1.73	1.41	65.8
56A10	0.53	1.4	99.66
56B11	0.67	1.39	20.41
56B12	1.6235	1.354	99.82
56E1	1.533	1.3415	96.22
56A3	0.65	1.33	0
56F3	1.483	1.308	52.51
56H9	0.4695	1.304	98.14
56C12	1.8365	1.3025	94.15
56H11	1.0935	1.2875	99.7
57B2	0.26	1.28	73.16
57C4	1.5415	1.2635	95.09
57E7	0.52	1.25	54.71
57H7	1.477	1.2145	31.7
57A8	0.7315	1.1915	95.2
57B8	0.7455	1.1735	99.71
57A9	1.6055	1.171	96.17
57G9	0.51	1.17	95.87
57A6	0.61	1.16	97.67
57F7	0.3	1.14	95.4
57F8	1.8115	1.133	0
57A11	0.21	1.12	28.81
57E11	0.63	1.11	88.69
58G6	1.74	1.096	99.7
58B5	0.6595	1.0815	52.93
58A4	1.636	0.9975	68.79
58D2	0.16	0.94	79.16
58G9	1.411	0.9155	54.18
58G1	1.097	0.914	75.47
58H3	1.492	0.913	52.07
58A3	1.355	0.9045	99.64
58E2	1.45	0.9045	51.6
59A1	1.197	0.903	99.61
59A2	1.34	0.8845	96.78
59H6	1.702	0.8845	19.06
59B9	1.276	0.8275	6.99
59F12	1.325	0.824	0
59B11	1.2755	0.798	0.17
59D6	0.3475	0.7735	99.71
510H2	0.892	0.7675	86.13
510A4	1.3955	0.7235	94.54
510G4	1.265	0.7035	93.69
510H4	1.452	0.7035	98.97
510A5	0.696	0.696	80.75
510F6	0.5725	0.681	1.31
510D7	0.8865	0.6665	94.27
510H7	0.68	0.66	84.65
510E10	0.761	0.658	72.14
510H10	1.9195	0.575	99.73
510B10	0.419	0.503	58.59
510B1	1.664	0.503	63.34
510G2	1.084	0.4745	0
510C4	1.238	0.4745	71.57
510H6	1.3375	0.4695	81.21
510D8	0.524	0.449	0
511A5	0.13	0.44	87.97
511E5	0.534	0.3515	75.71
511G5	0.4385	0.334	77.13
511A6	0.344	0.3175	81.77
511B7	0.3515	0.3175	95.14
511H7	1.125	0.289	83.34
511B11	0.3335	0.285	81.17
511A1	0.432	0.277	78.23
511B4	0.327	0.2375	87.59
511E7	0.3775	0.223	76.82
511G7	0.298	0.1715	77.37
511E9	0.254	0.159	76.93
511D11	0.1855	0.1475	84.13
511H11	0.127	0.129	77.8
511D12	0.1265	0.126	95.91
8B1E6	1.784	1.9495	85.54
8B1B1	1.872	1.9245	0
8B1H12	2.0835	1.921	45.12
8B1A11	2.0115	1.919	48.29
8B1E10	1.9315	1.8855	16.41
8B1F4	1.7455	1.857	28.47
8B1G3	1.883	1.8265	43.8
8B1E11	1.4475	1.8265	44.69
8B2D5	1.761	1.7605	7.59
8B2H8	1.577	1.6465	93.32
8B2D11	1.488	1.6315	17.78
8B2F2	1.4145	1.5275	64.52
8B2E4	1.487	1.4865	6.42
8B2G6	1.6825	1.4695	96.28
8B2H7	1.2225	1.3835	42.48
8B2E12	1.377	1.356	0
8B3G11	0.707	1.3135	0
8B3E9	1.113	1.2075	68.54
8B3D10	0.799	1.0375	85.78
8B4E1	0.918	1.014	0
8B4H2	1.511	0.9745	20.28
8B4A3	0.898	0.908	0
8B4C5	0.8825	0.8775	32.93
8B4E5	0.852	0.8525	99.3
8B4B6	1.164	0.834	59.58
8B4E11	0.7905	0.795	51.64
8B4E2	0.787	0.787	0
8B4F4	0.7685	0.742	55.28
8B4G4	0.844	0.728	49.43
8B4H4	0.563	0.7035	24.18
8B4B5	0.584	0.6115	0
8B4A7	0.511	0.589	0
8B4D9	0.728	0.551	15.44
8B4G11	0.2065	0.4685	32.32
8B5A1	0.22	0.453	52.56
8B5A5	0.364	0.4455	79.33
8B5A6	0.386	0.409	56.99
8B5B6	0.2705	0.3885	99.38
8B5C1	0.5535	0.384	68.79
8B5E5	0.455	0.355	69.32
8B5F7	0.634	0.312	82.7
8B5B4	0.227	0.2285	77.47
Negative	0.097	0.091	0
